# Supplementary material for: Maternal-based paternal DNA methylation remodeling in rice zygote
Source: Research Square preprint supplement (doi:10.21203/rs.3.rs-2923544/v1), 2023-06-30
Supplement: Supplementary file 1 [file 2cda35a70c4041ff51bbc8b4.docx]

**Supplementary Table 1**. Summary of BS-seq data.

| **Sample** | **Cell type** | **Replicate** | **Raw reads** | **Mapping reads** | **Unique mapping reads** | **Mapping rate** | **Paired reads** | **Duplication reads** | **Duplication rate** | **Bisulfite conversion rate** | **Sequencing depth (×)** |
| --- | --- | --- | --- | --- | --- | --- | --- | --- | --- | --- | --- |
| MH63 | Egg | 1 | 48,712,299 | 37,047,721 | 14,412,769 | 38.90% | 13,114,907 | 963,759 | 9.00% | 98.80% | 28.08 |
| MH63 | Egg | 2 | 43,102,219 | 32,750,038 | 12,738,380 | 38.90% | 11,614,010 | 1,124,370 | 8.83% | 98.91% | 24.83 |
| MH63 | Sperm | 1 | 118,293,182 | 88,336,272 | 32,383,329 | 36.70% | 25,660,385 | 6,722,942 | 20.76% | 98.66% | 66.96 |
| MH63 | Sperm | 2 | 133,819,783 | 99,456,838 | 36,185,124 | 36.40% | 27,851,478 | 8,333,645 | 23.03% | 98.98% | 75.39 |
| MH63 | Zygote | 1 | 48,389,482 | 36,088,153 | 13,400,253 | 37.10% | 12,032,202 | 1,368,051 | 10.21% | 98.77% | 27.36 |
| MH63 | Zygote | 2 | 69,491,742 | 53,938,810 | 19,417,065 | 36.00% | 17,071,393 | 2,345,671 | 12.08% | 99.38% | 40.89 |
| ZS97 | Egg | 1 | 99,194,514 | 74,983,500 | 29,575,353 | 39.40% | 26,638,452 | 2,936,898 | 9.93% | 99.03% | 56.84 |
| ZS97 | Egg | 2 | 108,926,875 | 83,513,641 | 33,020,654 | 39.50% | 29,528,186 | 3,492,467 | 10.58% | 98.94% | 63.31 |
| ZS97 | Sperm | 1 | 59,674,897 | 32,536,875 | 10,203,668 | 31.40% | 9,232,528 | 971,140 | 9.52% | 98.94% | 24.66 |
| ZS97 | Sperm | 2 | 71,160,822 | 38,330,552 | 12,361,025 | 32.20% | 11,009,159 | 1,351,866 | 10.94% | 98.87% | 29.06 |
| ZS97 | Zygote | 1 | 58,445,027 | 44,771,164 | 18,135,148 | 40.50% | 16,768,175 | 1,366,973 | 7.54% | 98.71% | 33.94 |
| ZS97 | Zygote | 2 | 58,976,701 | 47,426,906 | 18,587,803 | 39.20% | 17,169,368 | 1,418,434 | 7.63% | 98.64% | 35.95 |
| ZH11 | Egg | 1 | 74,141,968 | 69,320,934 | 25,276,014 | 36.50% | 16,368,122 | 8,907,887 | 35.24% | 98.60% | 52.55 |
| ZH11 | Egg | 2 | 85,367,823 | 79,830,279 | 29,019,598 | 36.40% | 17,635,050 | 11,384,541 | 39.23% | 98.50% | 60.51 |
| SY63 (ZS97×MH63) | Zygote | 1 | 76,047,006 | 66,217,828 | 32,131,208 | 48.50% | 20,409,981 | 11,721,223 | 36.48% | 98.80% | 50.19 |
| SY63 (ZS97×MH63) | Zygote | 2 | 68,582,841 | 59,716,827 | 29,941,439 | 50.10% | 19,194,312 | 10,747,122 | 35.89% | 98.62% | 45.27 |
| MZ (MH63×ZS97) | Zygote | 1 | 53,290,624 | 33,383,644 | 16,049,022 | 48.10% | 11,763,335 | 4,285,686 | 26.70% | 98.40% | 25.31 |
| MZ (MH63×ZS97) | Zygote | 2 | 60,391,330 | 37,134,161 | 17,548,262 | 47.30% | 12,668,605 | 4,879,649 | 27.81% | 98.72% | 28.15 |
| ZMH (ZH11×MH63) | Zygote | 1 | 59,303,272 | 53,923,065 | 21,741,671 | 40.30% | 10,814,226 | 10,927,445 | 50.26% | 98.40% | 40.88 |
| ZMH (ZH11×MH63) | Zygote | 2 | 86,455,240 | 78,267,805 | 31,330,217 | 40.00% | 14,414,548 | 16,915,668 | 53.99% | 98.50% | 59.33 |
| SY63 (ZS97×MH63) | Globular embryo | 1 | 47,981,035 | 39,669,194 | 18,775,882 | 47.30% | 13,830,486 | 4,945,391 | 26.34% | 98.85% | 30.07 |
| SY63 (ZS97×MH63) | Globular embryo | 2 | 107,856,400 | 97,794,767 | 43,392,524 | 44.40% | 29,456,061 | 13,936,456 | 32.12% | 98.82% | 74.13 |
| MZ (MH63×ZS97) | Globular embryo | 1 | 58,227,301 | 48,124,834 | 25,899,346 | 53.80% | 18,646,860 | 7,252,477 | 28.00% | 98.84% | 36.48 |
| MZ (MH63×ZS97) | Globular embryo | 2 | 56,717,144 | 46,773,606 | 25,159,799 | 53.80% | 17,971,641 | 7,188,150 | 28.57% | 98.89% | 35.46 |

**Supplementary Table 2.** Summary of RNA-seq data of rice gametes, hybrid zygotes and globular embryos.

| **Sample** | **Cell type** | **Replicate** | **Raw reads** | **Clean reads** | **Unique mapping reads** | **Mapping rate** | **Unique mapping rate** | **Sequencing depth (×)** |
| --- | --- | --- | --- | --- | --- | --- | --- | --- |
| MH63 | Sperm | 1 | 68,702,939 | 60,668,897 | 43,464,468 | 83.30% | 71.64% | 45.99 |
| MH63 | Sperm | 2 | 53,610,062 | 47,475,731 | 33,502,893 | 82.92% | 70.57% | 35.99 |
| MH63 | Sperm | 3 | 60,407,350 | 53,614,451 | 37,936,300 | 82.88% | 70.76% | 40.64 |
| MH63 | Egg | 1 | 52,532,426 | 38,058,279 | 18,139,195 | 86.02% | 47.66% | 28.85 |
| MH63 | Egg | 2 | 50,030,428 | 35,351,822 | 16,937,058 | 85.10% | 47.91% | 26.80 |
| MH63 | Egg | 3 | 49,717,522 | 34,572,789 | 16,527,105 | 85.26% | 47.80% | 26.21 |
| ZS97 | Sperm | 1 | 37,660,237 | 34,268,815 | 23,964,172 | 81.82% | 69.93% | 25.98 |
| ZS97 | Sperm | 2 | 42,663,175 | 37,582,102 | 25,395,812 | 80.69% | 67.57% | 28.49 |
| ZS97 | Sperm | 3 | 40,696,031 | 35,733,263 | 24,194,823 | 80.80% | 67.71% | 27.09 |
| ZS97 | Egg | 1 | 25,974,715 | 20,437,728 | 18,176,156 | 95.12% | 88.93% | 15.49 |
| ZS97 | Egg | 2 | 25,974,715 | 23,231,554 | 20,173,252 | 93.57% | 86.84% | 17.61 |
| ZS97 | Egg | 3 | 24,870,195 | 18,321,762 | 16,205,559 | 94.64% | 88.45% | 13.89 |
| SY63 (ZS97×MH63) | Zygote | 1 | 48,049,718 | 38,097,665 | 28,078,508 | 90.83% | 73.70% | 28.88 |
| SY63 (ZS97×MH63) | Zygote | 2 | 40,086,078 | 29,621,174 | 21,938,319 | 90.79% | 74.06% | 22.45 |
| SY63 (ZS97×MH63) | Zygote | 3 | 43,045,792 | 33,745,559 | 24,906,428 | 90.45% | 73.81% | 25.58 |
| SY63 (ZS97×MH63) | GE | 1 | 40,232,511 | 28,753,447 | 11,165,964 | 67.37% | 38.83% | 21.80 |
| SY63 (ZS97×MH63) | GE | 2 | 41,158,039 | 28,523,186 | 11,288,799 | 66.80% | 39.58% | 21.62 |
| SY63 (ZS97×MH63) | GE | 3 | 32,752,040 | 23,063,316 | 9,704,605 | 70.36% | 42.08% | 17.48 |
| MZ (MH63×ZS97) | Zygote | 1 | 43,098,456 | 30,432,243 | 14,538,079 | 73.03% | 47.77% | 23.07 |
| MZ (MH63×ZS97) | Zygote | 2 | 55,708,018 | 37,123,363 | 17,588,619 | 70.68% | 47.38% | 28.14 |
| MZ (MH63×ZS97) | Zygote | 3 | 48,383,975 | 32,007,194 | 14,578,072 | 68.98% | 45.55% | 24.26 |
| MZ (MH63×ZS97) | GE | 1 | 58,280,095 | 33,561,837 | 16,116,131 | 75.72% | 48.02% | 25.44 |
| MZ (MH63×ZS97) | GE | 2 | 51,975,612 | 30,255,395 | 15,141,778 | 76.55% | 50.05% | 22.93 |
| MZ (MH63×ZS97) | GE | 3 | 49,055,554 | 32,587,059 | 16,504,772 | 79.01% | 50.65% | 24.70 |
